# Supplementary material for: Thymine DNA Glycosylase (TDG) is involved in the pathogenesis of intestinal tumors with reduced APC expression
Source: PubMed Central journal article supplement (PMC5685726; doi:10.18632/oncotarget.21219), 2017-09-23
Supplement: oncotarget-08-89988-s001.pdf [file oncotarget-08-89988-s001.pdf]

## Thymine DNA Glycosylase (TDG) is involved in the pathogenesis of intestinal tumors with reduced APC expression

### SUPPLEMENTARY MATERIALS

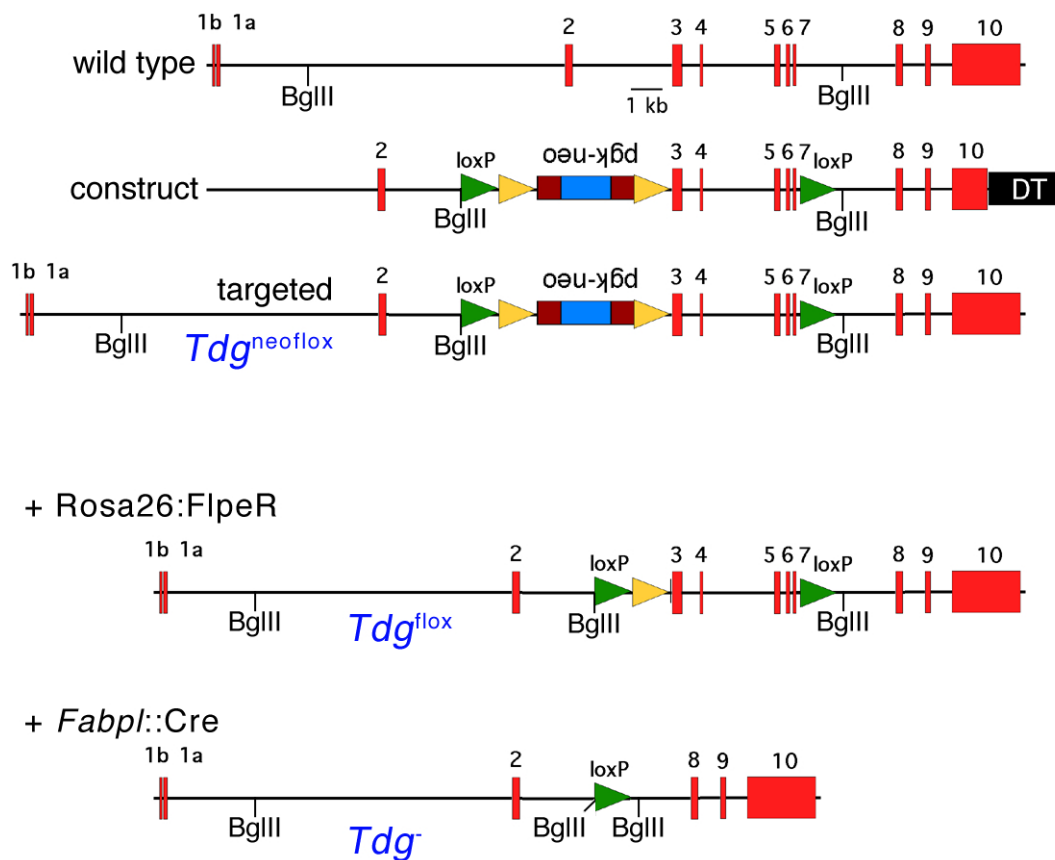

**Supplementary Figure 1: Production of the conditional *Tdg*<sup>lox</sup> allele.** In the *Tdg* targeting construct, a pgk-neo cassette flanked by *FRT* sites (yellow triangles) along with a *loxP* site (green triangle) is located between exons 2 and 3, while a *loxP* site is placed immediately downstream of exon 7; the diptheria toxin gene is marked as DT. The targeted recombinant *Tdg*<sup>neoflox</sup> allele was produced in ES cells after homologous recombination and allowed the generation of heterozygous *Tdg*<sup>neoflox/+</sup> mice. The conditional *Tdg*<sup>lox</sup> allele, in which Flp-mediated recombination between the *FRT* sites removes the neo<sup>R</sup> cassette, was produced by crossing *Tdg*<sup>neoflox/+</sup> mice with Rosa26::FlpeR transgenic mice. By crossing with *Fabp1*::Cre transgenic mice, the *Tdg*<sup>lox</sup> allele is converted in the null *Tdg* allele (deletions of exons 3 through 7).

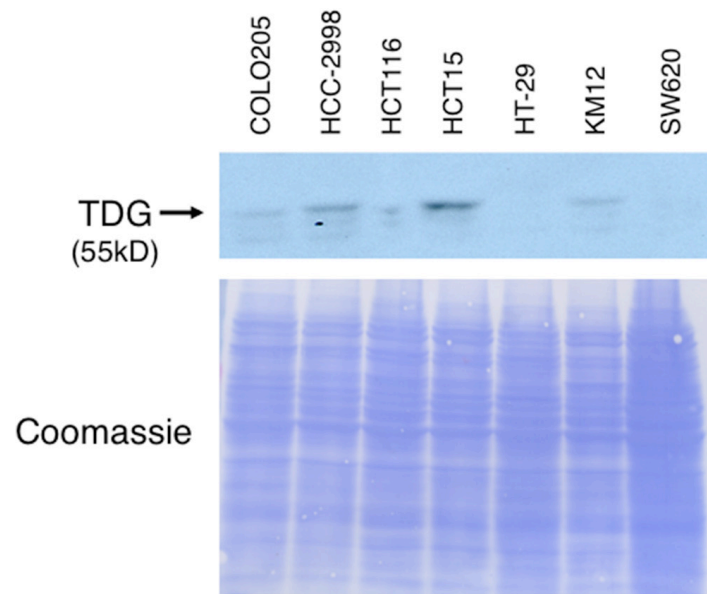

**Supplementary Figure 2: Levels of TDG protein in CRC cell lines of the NCI-60 panel.** Detection of TDG protein by western blotting (top panel) with an antibody against TDG. A Coomassie-stained gel (bottom panel) reveals that approximately equal amounts of protein lysate were loaded in each lane, except the last lane (SW620); despite the higher amounts of SW620 lysate loaded, the levels of TDG are very low in this cell line.

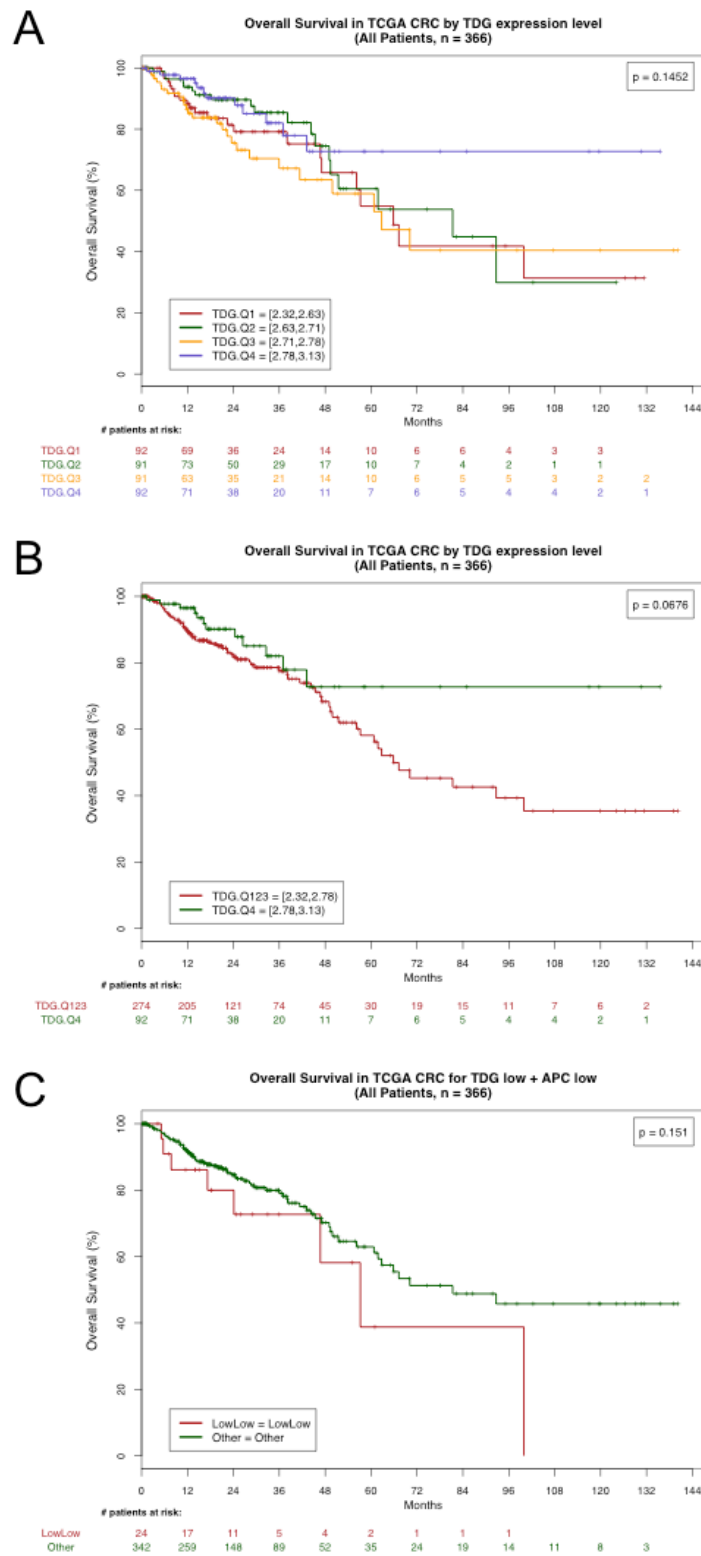

**Supplementary Figure 3: Survival analysis of patients in the TCGA COADREAD dataset according to *TDG* mRNA expression levels. (A)** Kaplan-Meier survival analysis according to the quartile of *TDG* mRNA expression; comparison of survival of the subset of patients within each quartile of *TDG* expression. **(B)** Kaplan-Meier survival analysis according to the quartile of *TDG* mRNA expression; comparison of survival of the subset of patients with high quartile of *TDG* expression vs. other quartiles combined together. **(C)** Kaplan-Meier survival analysis of the subset of patients with low quartile of both *TDG* and *APC* expression vs. other samples.
